# Supplementary material for: Predicted contextual modulation varies with distance from pinwheel centers in the orientation preference map
Source: PubMed Central journal article supplement — Sci Rep. 2011 Oct 12;1:114. doi: 10.1038/srep00114 (PMC3216596; doi:10.1038/srep00114), 2011-10-12
Supplement: srep00114-s1.pdf [file srep00114-s1.pdf]

# **Predicted contextual modulation varies with distance from pinwheel centers in the orientation preference map**

Tsuyoshi Okamoto\*<sup>1,2</sup>, Koji Ikezoe<sup>3</sup>, Hiroshi Tamura<sup>3</sup>, Masataka Watanabe<sup>4,5,6</sup>,  
Kazuyuki Aihara<sup>2,7</sup> & Ichiro Fujita<sup>3</sup>

<sup>1</sup>*Faculty of Medical Sciences, Kyushu University, 3-1-1 Maidashi, Higashi-ku, Fukuoka 812-8582, Japan.* <sup>2</sup>*Aihara Complexity Modelling Project, ERATO, JST, 3-23-5 Uehara, Shibuya-ku, Tokyo 151-0064, Japan.* <sup>3</sup>*Graduate School of Frontier Biosciences, Osaka University and CREST, JST, 1-3 Machikaneyama, Toyonaka-shi Osaka 560-8531, Japan.* <sup>4</sup>*Graduate School of Engineering, University of Tokyo, 7-3-1 Hongo, Bunkyo-Ku, Tokyo 113-8656, Japan.* <sup>5</sup>*Biological Cybernetics, Max Planck Institute, Spemannstr. 38-44, Tübingen 72076, Germany.* <sup>6</sup>*Brain Science Institute, RIKEN, 2-1 Hirosawa, Wako, Saitama 351-0198, Japan.* <sup>7</sup>*Institute of Industrial Science, University of Tokyo, 4-6-1 Komaba, Meguro-Ku, Tokyo 153-8505, Japan.*

Correspondence should be addressed to

Tsuyoshi Okamoto\* (okamoto@digital.med.kyushu-u.ac.jp)

Faculty of Medical Sciences, Kyushu University

3-1-1 Maidashi, Higashi-ku, Fukuoka 812-8582, Japan

Phone/FAX: +81-92-642-6740

Cc: Koji Ikezoe (ikezoe@bpe.es.osaka-u.ac.jp)

Hiroshi Tamura (tamura@fbs.osaka-u.ac.jp)

Masataka Watanabe (watanabe@tuebingen.mpg.de)

Kazuyuki Aihara (aihara@sat.t.u-tokyo.ac.jp)

Ichiro Fujita (fujita@fbs.osaka-u.ac.jp)

**Supplementary Information**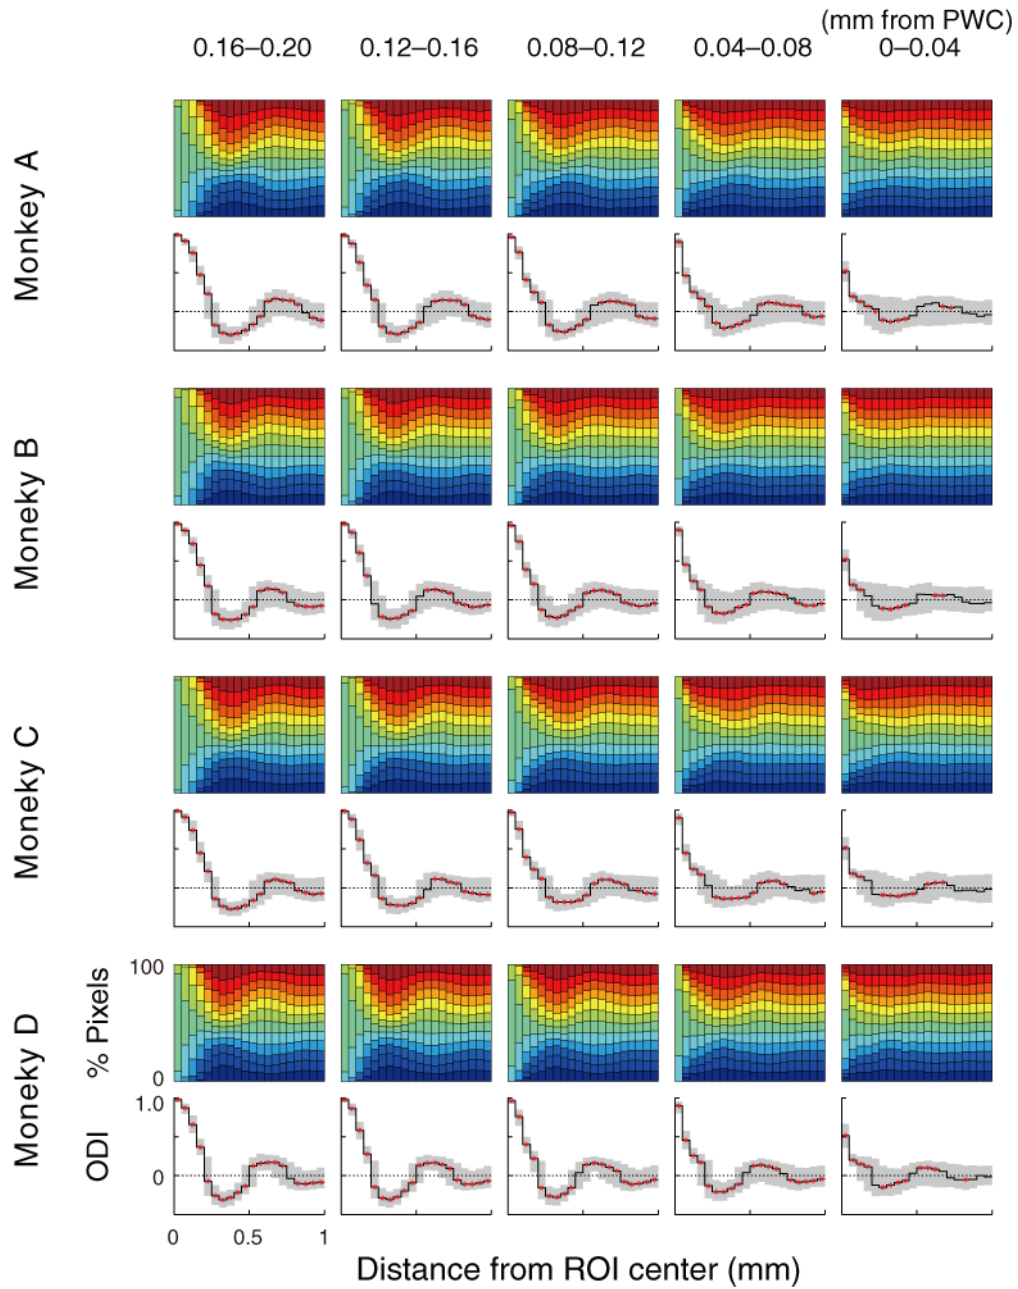**Supplementary Figure S1**

Spatial distribution of orientation preference obtained in V1 of four monkeys, plotted in the same format as in **Fig. 1c**.

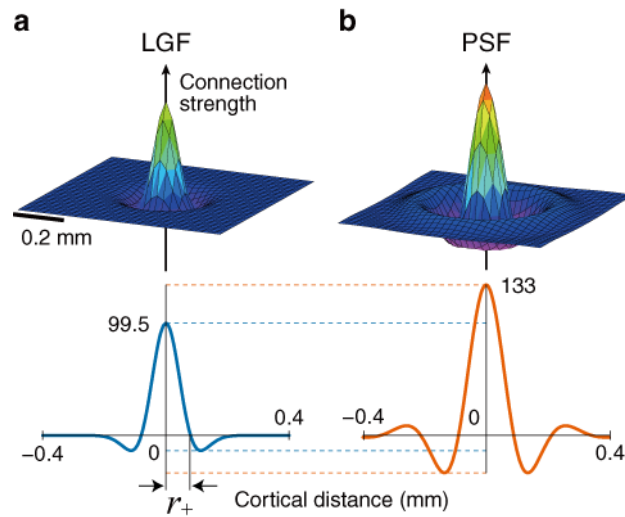

**Supplementary Figure S2**

Weighting profiles of Laplacian-of-Gaussian function (LGF) as a model for monosynaptic connections, and cortical point-spread function (PSF) as a model for polysynaptic connections. Examples of three-dimensional view (upper) and two-dimensional view (lower) of LGF (**a**) and PSF (**b**) are illustrated. A model parameter for spatial scale of monosynaptic connections,  $r_+$ , is depicted in the lower panel of (**a**).

$$d_{CS} = 2R_{FF} + r_+ = D_{CRF} - r_+$$

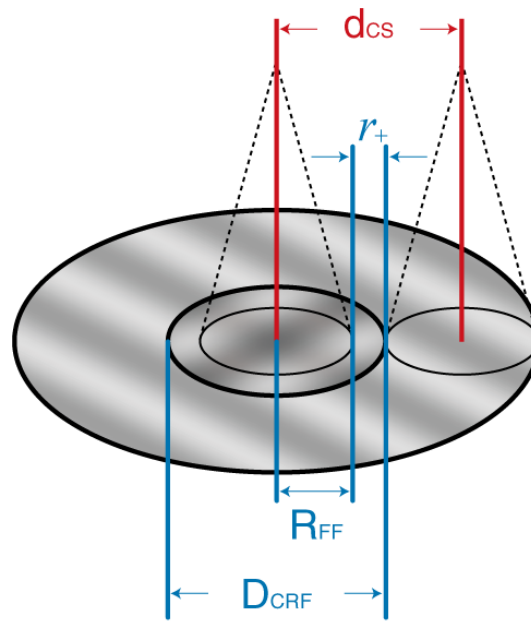

$$D_{CRF} = 2(R_{FF} + r_+)$$

### Supplementary Figure S3

Schematic diagram of the relationship between visual field and cortical field, with regard to contextual stimuli.
